# Supplementary material
Source: Springer Nature journal article supplement (https://www.springermedizin.de/resource/supplementary/13063_2009_342_MOESM2_ESM.pdf/9618024)

**Figure 1. Study Flow Chart**

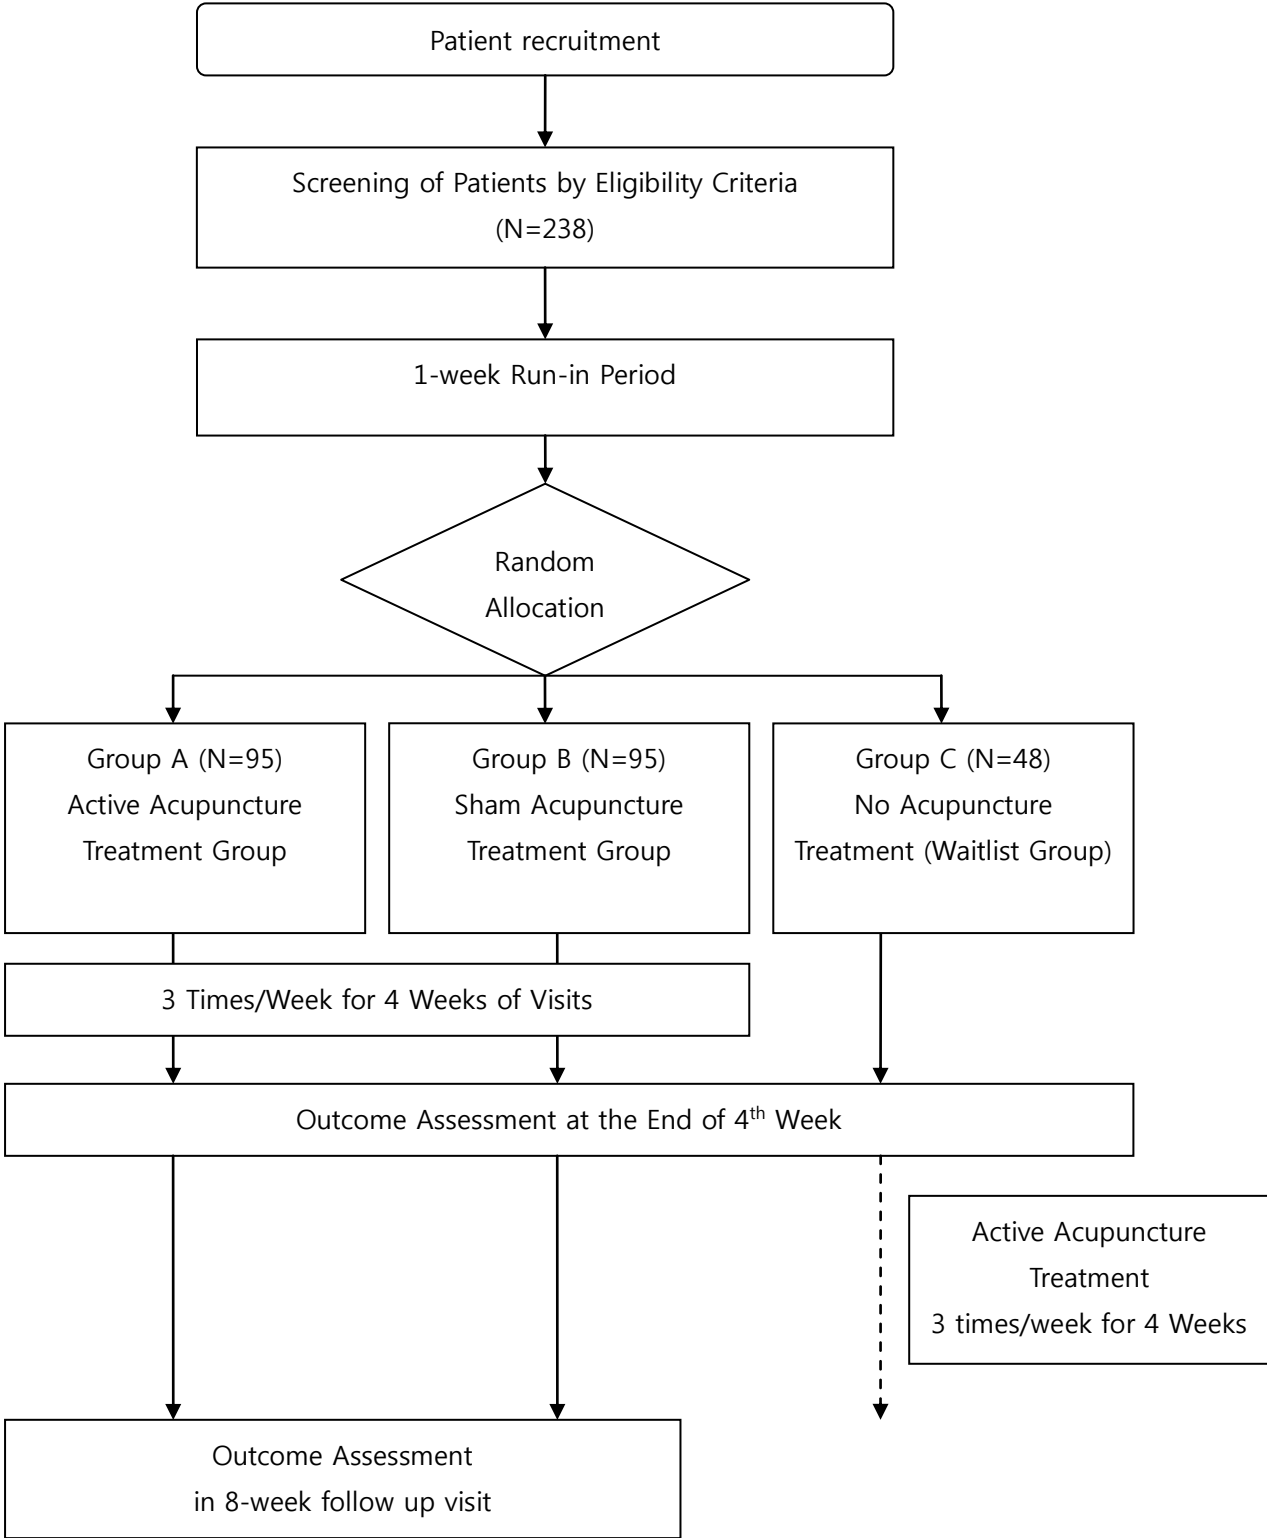

Supplement: MOESM2 [file 9618024]
